# Supplementary material for: Leukemic Stem Cell Quantification in Newly Diagnosed Patients With Chronic Myeloid Leukemia Predicts Response to Nilotinib Therapy
Source: Oxford University Press journal article supplement (doi:10.1158/1078-0432.ccr-15-2791), 2016-03-22
Supplement: 10780432ccr152791-sup-158339_1_supp_3348492_w2w722.docx [file 10780432ccr152791-sup-158339_1_supp_3348492_w2w722.docx]

**SUPPLEMENTAL MATERIAL**

**Supplemental Figure 3.**


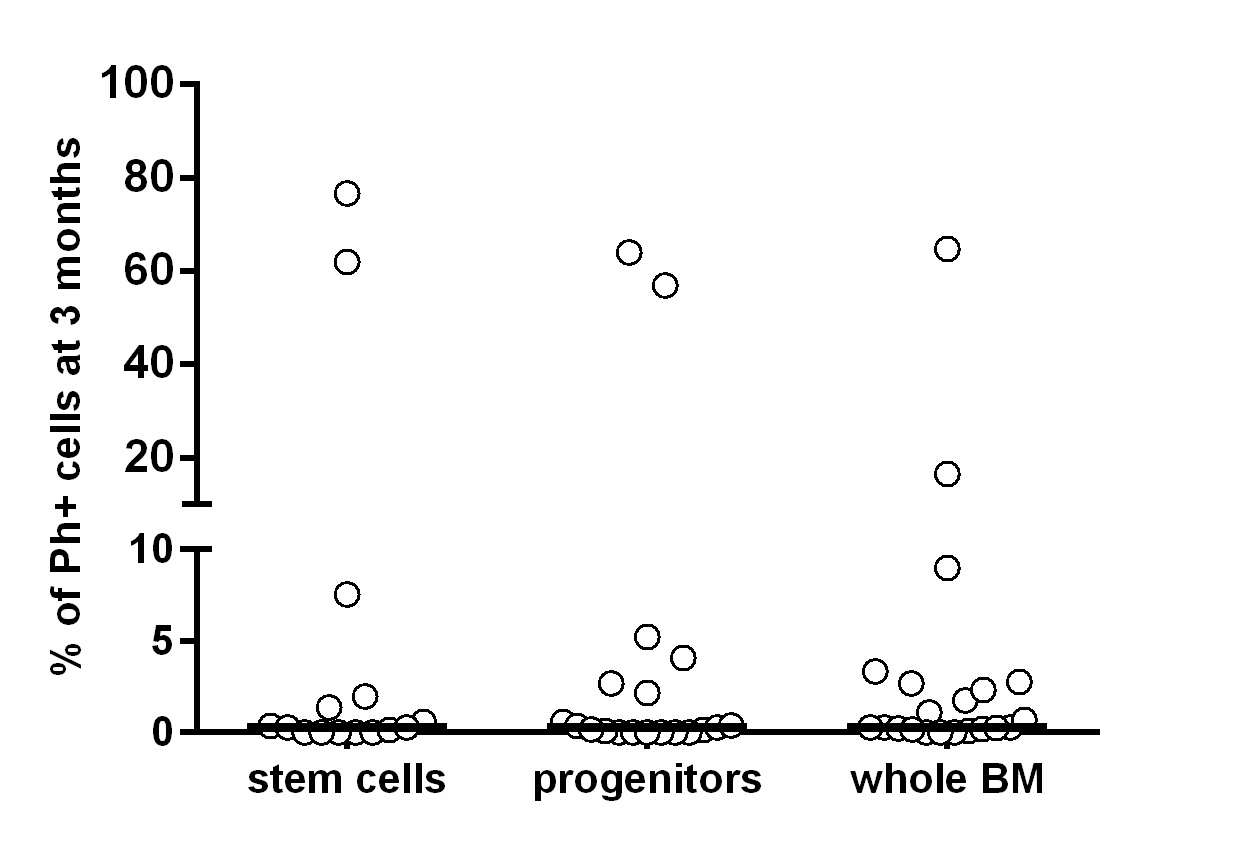


**Supplemental Figure 3:** The proportion of Ph+ cells at 3 months in the stem and progenitor cell compartment and whole BM as measured by sorting plus FISH. The mean and median percentages of Ph+ cells were 10% and 0.3% in the LSC fractions, 7.2% and 0.3% in the LPC fractions and 5.1% and 0.3% in the whole BM fractions. Black lines represent mean values.
